# Supplementary material for: Noninvasive early detection of colorectal cancer by hypermethylation of the LINC00473 promoter in plasma cell-free DNA
Source: PubMed Central journal article supplement (PMC9271259; doi:10.1186/s13148-022-01302-x), 2022-07-09

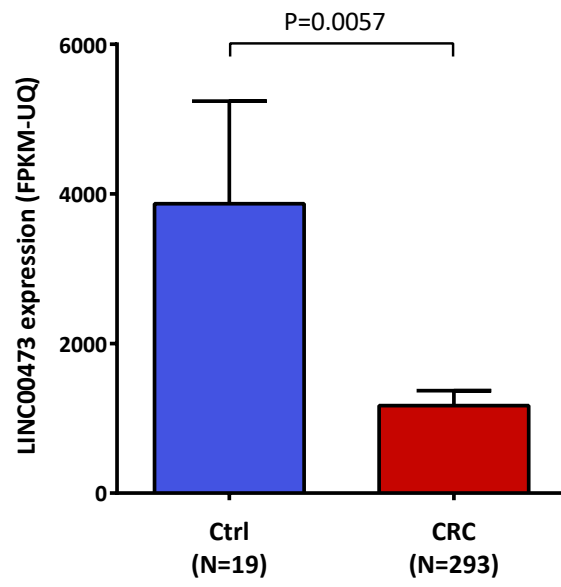

Supplement: 13148_2022_1302_MOESM1_ESM.pdf [file 13148_2022_1302_MOESM1_ESM.pdf]
