# Supplementary material for: Noninvasive early detection of colorectal cancer by hypermethylation of the LINC00473 promoter in plasma cell-free DNA
Source: PubMed Central journal article supplement (PMC9271259; doi:10.1186/s13148-022-01302-x), 2022-07-09
Supplement: 13148_2022_1302_MOESM7_ESM.pdf [file 13148_2022_1302_MOESM7_ESM.pdf]

**Supplementary Table S1.** General description of the patient cohorts included in the study.

| <b>Cohort ID</b> | <b>Description</b>                                                                                                                                                            | <b>Institution/Hospital</b>                                                                                                                                                                                                                                                      |
|------------------|-------------------------------------------------------------------------------------------------------------------------------------------------------------------------------|----------------------------------------------------------------------------------------------------------------------------------------------------------------------------------------------------------------------------------------------------------------------------------|
| 1                | Primary colorectal tumors and matched normal colorectal mucosa                                                                                                                | The Cancer Genome Atlas (TCGA), NCBI, USA                                                                                                                                                                                                                                        |
| 2                |                                                                                                                                                                               | Bellvitge Biomedical Research Institute (IDIBELL), Spain                                                                                                                                                                                                                         |
| 3                | Primary colorectal tumors and matched normal colorectal mucosa and colorectal polyps                                                                                          | Department of Molecular Diagnostics and Experimental Therapeutics (MDET) of the City of Hope National Medical Center, USA                                                                                                                                                        |
| 4                | Polyps and normal mucosa from non-cancer patients                                                                                                                             | Complejo Hospitalario Universitario de Ferrol, Spain                                                                                                                                                                                                                             |
| 5                | Plasma samples from self-declared healthy controls and CRC patients                                                                                                           | Complejo Hospitalario Universitario de Compostela, Spain                                                                                                                                                                                                                         |
| 6                | Plasma samples from self-declared healthy controls and patients with ACPs presenting at least one polyp >10 mm previously confirmed by colonoscopy.                           |                                                                                                                                                                                                                                                                                  |
| 7                | Plasma samples obtained either prior to a scheduled colonoscopy as part of standard CRC screening or prior to colonic surgery for primary tumor                               | Complejo Hospitalario Universitario de Vigo, Instituto Valenciano de Oncología, Hospital Universitario de Burgos, Hospital General Universitario de Alicante, Complejo Hospitalario Universitario de Ourense and Hospital Clínico Universitario Lozano Blesa de Zaragoza, Spain. |
| 8                | Serial plasma samples collected at different clinically relevant time points from six randomly selected metastatic CRC (mCRC) patients under first-line standard chemotherapy | Complejo Hospitalario Universitario de Santiago de Compostela, Spain                                                                                                                                                                                                             |
