# Supplementary material for: Noninvasive early detection of colorectal cancer by hypermethylation of the LINC00473 promoter in plasma cell-free DNA
Source: PubMed Central journal article supplement (PMC9271259; doi:10.1186/s13148-022-01302-x), 2022-07-09
Supplement: 13148_2022_1302_MOESM8_ESM.pdf [file 13148_2022_1302_MOESM8_ESM.pdf]

**Supplementary Table S2.** Demographic and clinical characteristics of the patient cohorts included in the study.

| Characteristics                | Colorectal tissue (FFPE) |                |                  |                |                 |                  |               |                 |                  | Plasma (cfDNA)  |               |                 |               |                 |               |               |
|--------------------------------|--------------------------|----------------|------------------|----------------|-----------------|------------------|---------------|-----------------|------------------|-----------------|---------------|-----------------|---------------|-----------------|---------------|---------------|
|                                | Cohort 1 (N=331)         |                | Cohort 2 (N=262) |                | Cohort 3 (N=36) |                  |               | Cohort 4 (N=70) |                  | Cohort 5 (N=54) |               | Cohort 6 (N=58) |               | Cohort 7 (N=57) |               |               |
|                                | Ctrl<br>(N=38)           | CRC<br>(N=293) | Ctrl<br>(N=82)   | CRC<br>(N=180) | Ctrl<br>(N=12)  | Polyps<br>(N=12) | CRC<br>(N=12) | Ctrl<br>(N=10)  | Polyps<br>(N=60) | Ctrl<br>(N=28)  | CRC<br>(N=26) | Ctrl<br>(N=34)  | ACP<br>(N=24) | Ctrl<br>(N=19)  | ACP<br>(N=17) | CRC<br>(N=21) |
| <b>Mean age, years (range)</b> | 69<br>(42-90)            | 65<br>(31-90)  | 66<br>(31-90)    | 67<br>(31-91)  | 71<br>(49-89)   | 66<br>(47-87)    | 64            | 64<br>(62-82)   | 65<br>(50-88)    | 51              | 67            | 29              | 69            | 53<br>(21-88)   | 66<br>(54-83) | 71<br>(50-88) |
| <b>Gender</b>                  |                          |                |                  |                |                 |                  |               |                 |                  |                 |               |                 |               |                 |               |               |
| Male                           | 21<br>(55%)              | 157<br>(54%)   | 46<br>(56%)      | 114<br>(63%)   | 7               | 11<br>(91.7%)    | 3<br>(25%)    | 6<br>(60%)      | 42<br>(70%)      | 12<br>(42.9%)   | 17<br>(65.4%) | 17<br>(50.0%)   | 14<br>(58.3%) | 6<br>(31.6%)    | 14<br>(82.4%) | 11<br>(52.3%) |
| Female                         | 17<br>(45%)              | 136<br>(46%)   | 36<br>(44%)      | 66<br>(37%)    | 5               | 1<br>(8.3%)      | 9<br>(75%)    | 4<br>(40%)      | 18<br>(30%)      | 16<br>(57.1%)   | 9<br>(34.6%)  | 17<br>(50.0%)   | 10<br>(41.7%) | 13<br>(68.4%)   | 3<br>(17.6%)  | 9<br>(42.9%)  |
| Unknown                        | -                        | -              | -                | -              | -               | -                | -             | -               | -                | -               | -             | -               | -             | -               | -             | 1<br>(4.8)    |
| <b>CRC Stage</b>               |                          |                |                  |                |                 |                  |               |                 |                  |                 |               |                 |               |                 |               |               |
| I                              | -                        | 44<br>(15.0%)  | -                | 10<br>(5.5%)   | -               | -                | 7<br>(58.3%)  | -               | -                | -               | -             | -               | -             | -               | -             | 2<br>(9.5%)   |
| II                             | -                        | 113<br>(38.6%) | -                | 84<br>(46.7%)  | -               | -                | 2<br>(16.7%)  | -               | -                | -               | -             | -               | -             | -               | -             | 2<br>(9.5%)   |
| III                            | -                        | 85<br>(29.0%)  | -                | 56<br>(31.1%)  | -               | -                | -             | -               | -                | -               | 4<br>(15.4%)  | -               | -             | -               | -             | 3<br>(14.3%)  |
| IV                             | -                        | 41<br>(14.0%)  | -                | 28<br>(15.6%)  | -               | -                | 3<br>(25%)    | -               | -                | -               | 22<br>(84.6%) | -               | -             | -               | -             | 8<br>(38.1%)  |
| Unknown                        | -                        | 10<br>(3.4%)   | -                | 2<br>(1.1%)    | -               | -                | -             | -               | -                | -               | -             | -               | -             | -               | -             | 6<br>(28.6%)  |
| <b>Type of polyp</b>           |                          |                |                  |                |                 |                  |               |                 |                  |                 |               |                 |               |                 |               |               |
| Hyperplastic                   | -                        | -              | -                | -              | -               | -                | -             | -               | 10<br>(16.7%)    | -               | -             | -               | -             | -               | -             | -             |
| Adenomatous                    | -                        | -              | -                | -              | -               | 11<br>(91.7%)    | -             | -               | 20<br>(33.3%)    | -               | -             | -               | 23<br>(95.8%) | -               | 17<br>(100%)  | -             |
| Serrated                       | -                        | -              | -                | -              | -               | 1<br>(8.3%)      | -             | -               | 30<br>(50%)      | -               | -             | -               | 1<br>(4.2%)   | -               | 0<br>(0%)     | -             |
| Unknown                        | -                        | -              | -                | -              | -               | -                | -             | -               | -                | -               | -             | -               | -             | -               | -             | -             |
| <b>Polyp status</b>            |                          |                |                  |                |                 |                  |               |                 |                  |                 |               |                 |               |                 |               |               |
| N-ACP                          | -                        | -              | -                | -              | -               | 4<br>(33.3%)     | -             | -               | 24<br>(40%)      | -               | -             | -               | -             | -               | -             | -             |
| ACP                            | -                        | -              | -                | -              | -               | 8<br>(66.7%)     | -             | -               | 35<br>(58.3%)    | -               | -             | -               | 24<br>(100%)  | -               | 17<br>(100%)  | -             |
| Unknown                        | -                        | -              | -                | -              | -               | -                | -             | -               | 1<br>(1.7%)      | -               | -             | -               | -             | -               | -             | -             |

Ctrl, control; CRC, colorectal, N-ACP, non-advanced colorectal polyp; ACP, advanced colorectal polyp.
