# Supplementary material for: Noninvasive early detection of colorectal cancer by hypermethylation of the LINC00473 promoter in plasma cell-free DNA
Source: PubMed Central journal article supplement (PMC9271259; doi:10.1186/s13148-022-01302-x), 2022-07-09
Supplement: 13148_2022_1302_MOESM9_ESM.pdf [file 13148_2022_1302_MOESM9_ESM.pdf]

**Supplementary Table S3.** Demographic and clinical characteristics of metastatic colorectal cancer patients from cohort 8.

| <b>Characteristics</b>                      | <b>Patients</b> |
|---------------------------------------------|-----------------|
| <b>Size - no.</b>                           | 6               |
| <b>Age - years</b>                          |                 |
| Median (range)                              | 61 (47- 81)     |
| <b>Sex - no. (%)</b>                        |                 |
| Female                                      | 3 (50)          |
| Male                                        | 3 (50)          |
| <b>ECOG-PS - no. (%)</b>                    |                 |
| 1                                           | 5 (83)          |
| 2                                           | 1 (17)          |
| <b>Primary tumour site - no. (%)</b>        |                 |
| Right colon                                 | 1 (17)          |
| Transverse colon (proximal two thirds)      | 1 (17)          |
| Left colon                                  | 5 (83)          |
| Sigmoid colon                               | 2 (33)          |
| Rectosigmoid junction                       | 2 (33)          |
| Rectum                                      | 1 (17)          |
| <b>RAS status - no. (%)</b>                 |                 |
| Mutated                                     | 3 (50)          |
| KRAS mutation                               | 3 (50)          |
| No mutated                                  | 3 (50)          |
| <b>BRAF status - no. (%)</b>                |                 |
| No mutated                                  | 6 (100)         |
| <b>MMR status - no. (%)</b>                 |                 |
| Preserved                                   | 5 (83)          |
| Deficient                                   | 1 (17)          |
| MLH1/PMS2 deficient                         | 1 (17)          |
| <b>TNM stage at diagnosis - no. (%)</b>     |                 |
| I                                           | 1 (17)          |
| IV                                          | 5 (83)          |
| <b>Site of metastases - no. (%)</b>         |                 |
| Liver                                       | 5 (83)          |
| Lung                                        | 3 (50)          |
| Peritoneum                                  | 1 (17)          |
| <b>Number of metastatic sites - no. (%)</b> |                 |
| 1                                           | 3 (50)          |
| 2                                           | 3 (50)          |
| <b>Primary tumor resection - no. (%)</b>    |                 |
| Yes                                         | 4 (67)          |
| No                                          | 2 (33)          |
| <b>CEA - no. (%)</b>                        |                 |
| ≤5 ng/mL                                    | 1 (17)          |
| >5 ng/mL                                    | 5 (83)          |
| <b>Chemotherapy regimen - no. (%)</b>       |                 |
| mFOLFOX6                                    | 4 (67)          |
| FOLFIRI                                     | 1 (17)          |
| 5-FU/LV                                     | 1 (17)          |
| <b>Antibody - no. (%)</b>                   | 3 (50)          |
| Anti-EGFR                                   | 3 (50)          |
| Cetuximab                                   | 2 (33)          |
| Panitumumab                                 | 1 (17)          |
